# Supplementary material for: A three dimensional nanowall of calcein/layered double hydroxide as an electrogenerated chemiluminescence sensor
Source: Royal Society of Chemistry journal article supplement (doi:10.1039/c5ra17826f), 2015-01-01
Supplement: c5ra17826f1.pdf [file c5ra17826f1.pdf]

# Supporting information for

## Three Dimensional Nanowall of Calcein/Layered Double Hydroxide: Towards Electrogenerated Chemiluminescence Sensor

Wenyi Shi,<sup>a,\*</sup> Liqian Bai, Jian Guo, Yufei Zhao<sup>b</sup>

<sup>a</sup>State Key Laboratory of Chemical Resource Engineering, Beijing University of Chemical  
Technology, Beijing 100029, P. R. China

<sup>b</sup>Key Laboratory of Photochemical Conversion and Optoelectronic Materials, Technical Institute  
of Physics and Chemistry, Chinese Academy of Sciences, Beijing 100190, P. R. China

### Experimental section

#### 1.1 Preparation of the parallel Calcein/LDH film

The Mg<sub>2</sub>Al-NO<sub>3</sub> LDH precursor was synthesized by the hydrothermal method reported previously. Subsequently, the Calcein intercalated LDH composites were prepared following the ion-exchange method. Calcein (*a* mol) were dissolved in 150 mL of water, in which  $x = a/n(\text{Al}) = 0.1\%, 1.25\%, 10\%, \text{ and } 100\%$ , respectively. This solution was adjusted to pH=7.0 with a NaOH (0.2 mol/L) solution. Then freshly prepared Mg<sub>2</sub>Al-NO<sub>3</sub> LDH (0.5 g) was dispersed in the solution thoroughly. The suspension was adjusted to pH=7.0 and stirred at room temperature under N<sub>2</sub> atmosphere for 48 h. The product Calcein/LDH (*x*%) was washed extensively with water.

#### 1.2 Fabrication of the parallel Calcein/LDH (*x*%) films

The parallel films of Calcein/LDH (*x*%) were fabricated by solvent evaporation method. Substrates of ITO wafer were firstly cleaned by immersing in a bath of deionized water in an

ultrasonic bath for 30 min. Pasty Calcein/LDH ( $x\%$ ) (0.05 g) was suspended in 20 mL of water under  $N_2$  atmosphere in an ultrasonic bath (99 W, 28 kHz) at room temperature for 5 min. Then, the resulting Calcein/LDH ( $x\%$ ) suspension was dropped on quartz and ITO substrates and dried in vacuum at ambient temperature for 5 h.

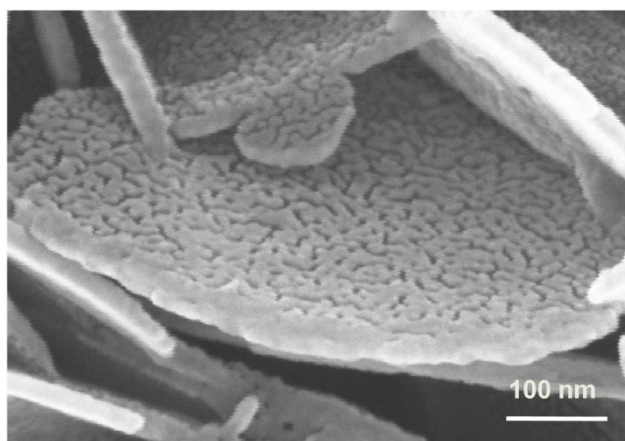

Figure S1. Top-view SEM images of the Calcein/LDH nanowall film under high-magnification.

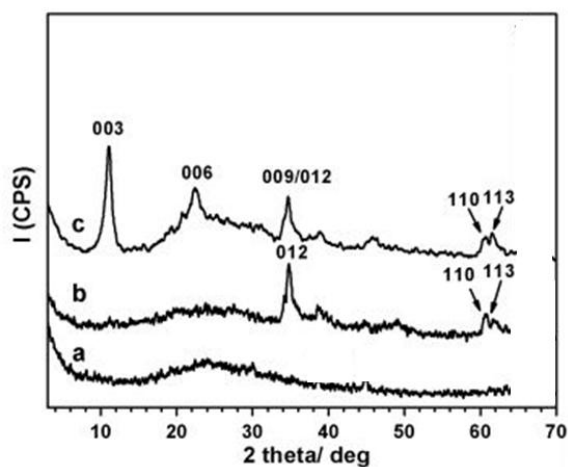

**Figure S2.** XRD patterns of (a) ITO substrate, (b) the  $MgAl-CO_3-LDHs$  film, and (c) the  $MgAl-CO_3-LDHs$  powder scraped from the film.

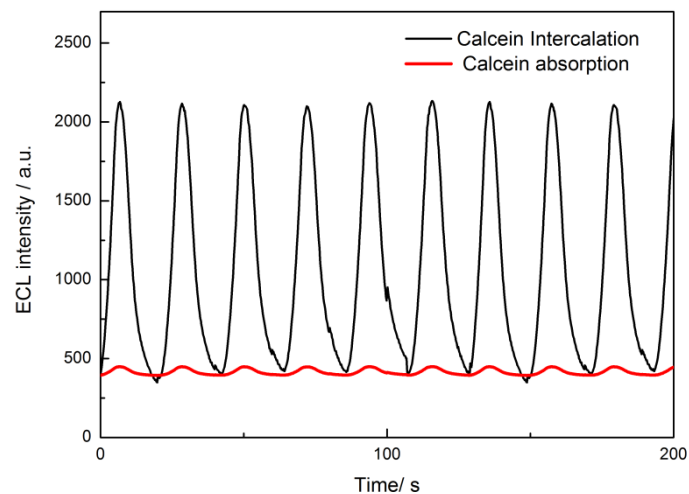

**Figure S3.** ECL spectra of the Calcein/LDH film and Calcein adsorbed LDH film.

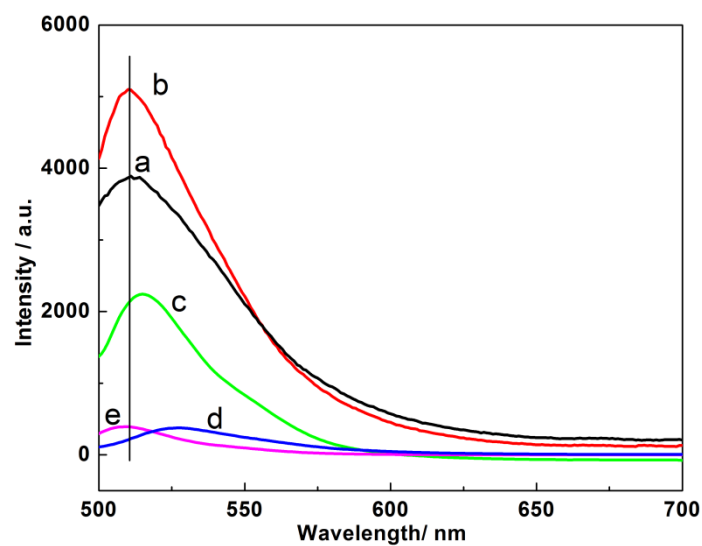

**Figure S4.** (A) The photoemission spectra of the parallel Calcein/LDH ( $x\%$ ) film for (a)~(d)  $x = 0.1\%$ ,  $1.25\%$ ,  $10\%$ , and  $100\%$ , respectively and (e) pristine Calcein in solution with the excitation wavelength of  $490\text{ nm}$ .

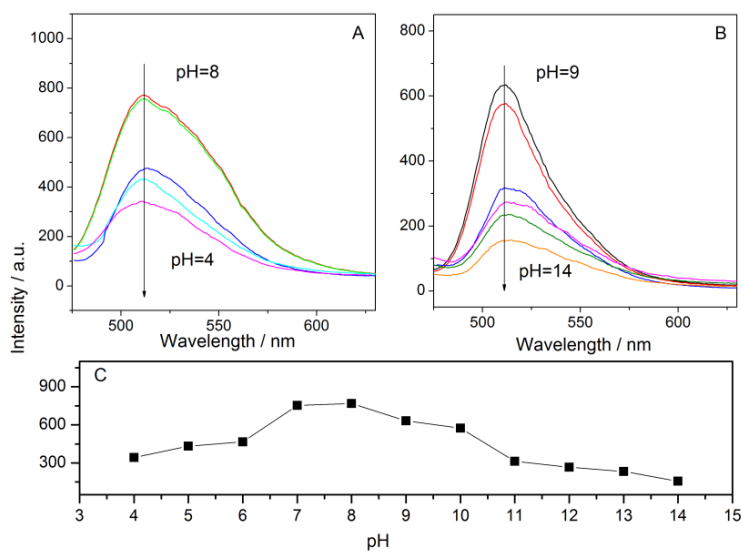

**Figure S5.** (A) and (B) Emission spectra of the Calcein/LDH nanowall film at different pH values (295 K,  $\lambda_{\text{ex}}=498$  nm); (C) pH titration curve for the Calcein/LDH nanowall film.

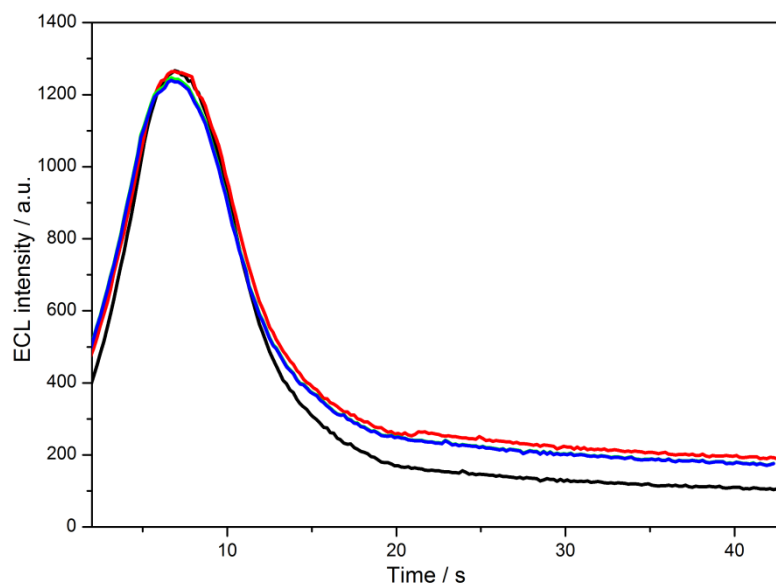

**Figure S6.** Storage stability of ECL sensor for the Calcein/LDH nanowall film stored in 0.1 M PBS of pH 7.4 at 4 °C for one month.

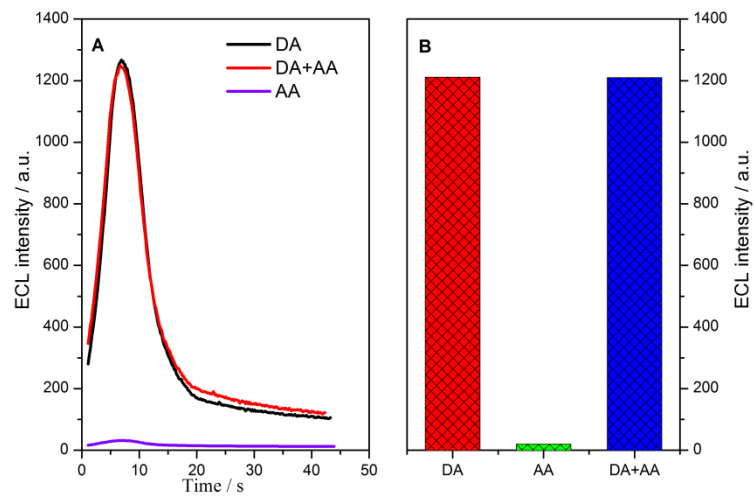

**Figure S7.** (A) ECL spectra of the Calcein/LDH nanowall film and (B) column graph recorded in 0.1 mM DA and 50 mM AA (0.1 M PBS at pH=7.4).
